# Supplementary material for: Trace element determination by femtosecond LA-ICP-MS in 10 mg extraterrestrial geological samples prepared as lithium borate glasses
Source: Royal Society of Chemistry journal article supplement (doi:10.1039/d4ja00275j), 2024-01-01
Supplement: d4ja00275j1.xlsx [file d4ja00275j1.xlsx]

## Sheet: Table S1
Manufacture :	Shanghai Chemlab Instrument Co., Ltd., China
Model :	GenesisGEO
Wavelength :	343 nm
Pulse duration：	250 fs
Maximum output power：	3 W
Laser source type：	Yb : fiber
Spot size range：	1～500 μm
Maximum fluence：	50 J cm-2

## Sheet: Table S2
Element	isotope	LOD (μg g-1) BHVO-2	LOQ	LOD (μg g-1) 610	LOD (μg g-1) 610 Qiu et al., 2023	Flux blank (n=9, μg g-1)
Sc	45	3.36	11.088	0.08	0.1	<LOD
V	51	0.32	26.56	0.03	0.03	25.5
Cr	53	20	66	0.37	0.73	<LOD
Co	59	0.89	3.85	0.04	0.05	0.91
Ni	60	23.5	77.55	0.45	0.43	<LOD
Cu	63	5.02	16.566	0.11	0.23	<LOD
Zn	66	3.29	25.86	0.09	0.55	15
Ga	71	1.32	4.356	0.05	0.09	<LOD
Rb	85	0.06	0.198	0.02	0.11	<LOD
Sr	88	0.04	0.132	0.02	0.01	<LOD
Y	89	0.06	0.198	0.02	0.01	<LOD
Zr	91	0.97	3.201	0.03	0.08	<LOD
Nb	93	0.04	0.132	0.02	0.01	<LOD
Ba	137	0.18	10.89	0.03	0.06	10.3
La	139	0.007	0.04	0.009	0.007	0.02
Ce	140	0.007	0.07	0.009	0.007	0.05
Pr	141	0.006	0.0198	0.008	0.005	<LOD
Nd	143	0.03	0.099	0.02	0.05	<LOD
Sm	147	0.04	0.132	0.02	0.04	<LOD
Eu	151	0.01	0.033	0.01	0.02	<LOD
Gd	155	0.04	0.132	0.02	0.05	<LOD
Tb	159	0.006	0.0198	0.008	0.005	<LOD
Dy	163	0.02	0.066	0.02	0.02	<LOD
Ho	165	0.006	0.0198	0.008	0.005	<LOD
Er	166	0.02	0.066	0.01	0.01	<LOD
Tm	169	0.005	0.0165	0.007	0.005	<LOD
Yb	173	0.02	0.066	0.016	0.03	<LOD
Lu	175	0.005	0.0165	0.008	0.005	<LOD
Hf	178	0.02	0.066	0.02	0.02	<LOD
Ta	181	0.007	0.03	0.01	0.007	0.01
Th	232	0.009	0.0297	0.01	0.009	<LOD
U	238	0.007	0.03	0.01	0.007	0.01
